# Supplementary material
Source: PubMed Central journal article supplement (PMC6957927)
Supplement: NIHMS1542991-supplement-1.pdf [file NIHMS1542991-supplement-1.pdf]

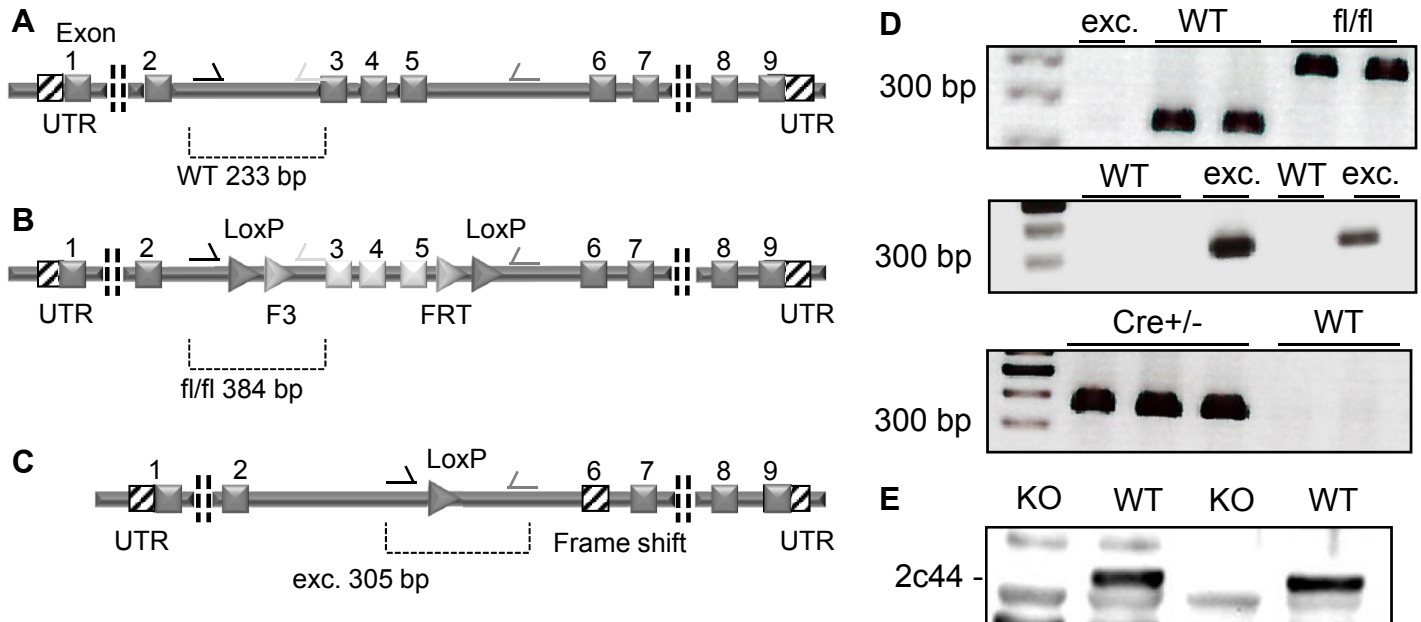

**Supplementary Figure 1. Schematic depiction (not drawn to scale) of a Cre-dependent *Cyp2c44* knock out mouse. (A) *Cyp2c44* wild-type genomic locus. (B) Conditional knockout allele after *in vivo* FLP recombination. (C) Constitutive knockout allele after Cre recombination. Primer binding sites for genotyping are marked with arrows. (D) PCR-based detection of the floxed locus (fl/fl), and wild-type (WT) alleles, as well as detection of excision (exc.) after Cre recombination. (E) Western blot showing *Cyp2c44* expression in livers (microsomal fractions) from wild-type (WT) and *Cyp2c44*<sup>-/-</sup> mice.**

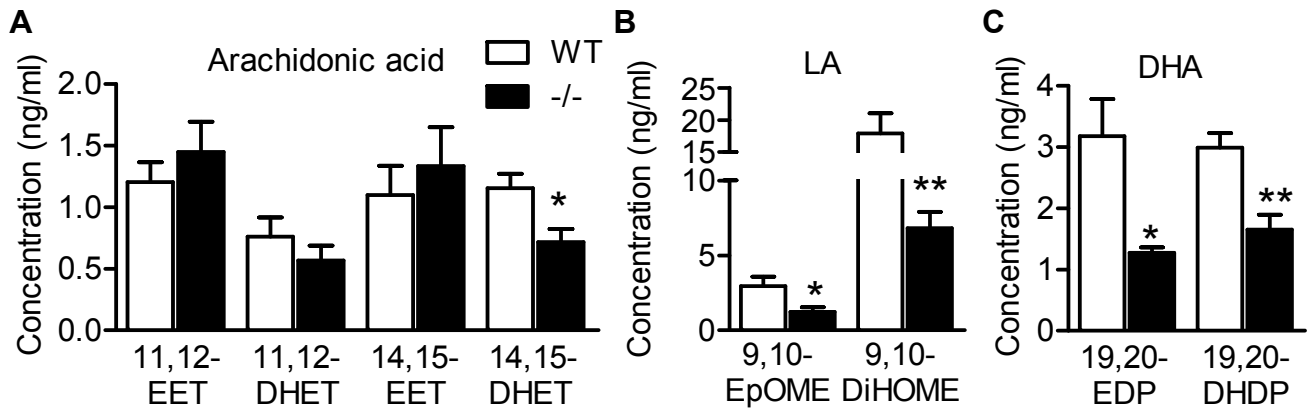

**Supplementary Figure 2. PUFA metabolite profile in the blood plasma of the adult mice.** Fatty acids from adult wild-type (WT) and *Cyp2c44*<sup>-/-</sup> (-/-) mice were extracted from blood plasma and determined by LC-MS/MS. **(A)** Arachidonic acid derived 11,12- and 14,15-epoxyeicosatrienoic acid (EET) and 11,12- and 14,15- dihydroxyeicosatrienoic acid (DHET). **(B)** Linoleic acid (LA)-derived 9,10-epoxyoctadecenoic acid (EpOME) and 9,10- dihydroxyoctadecenoic acid (DiHOME). **(C)** Docosahexenoic acid (DHA)-derived 19,20-epoxydocosapentaenoic acid (19,20-EDP) and 19,20- dihydroxydocosapentaenoic acid (DHDP). The graphs summarize data from 6-9 animals in each group; \*P<0.05 \*\*P<0.01)

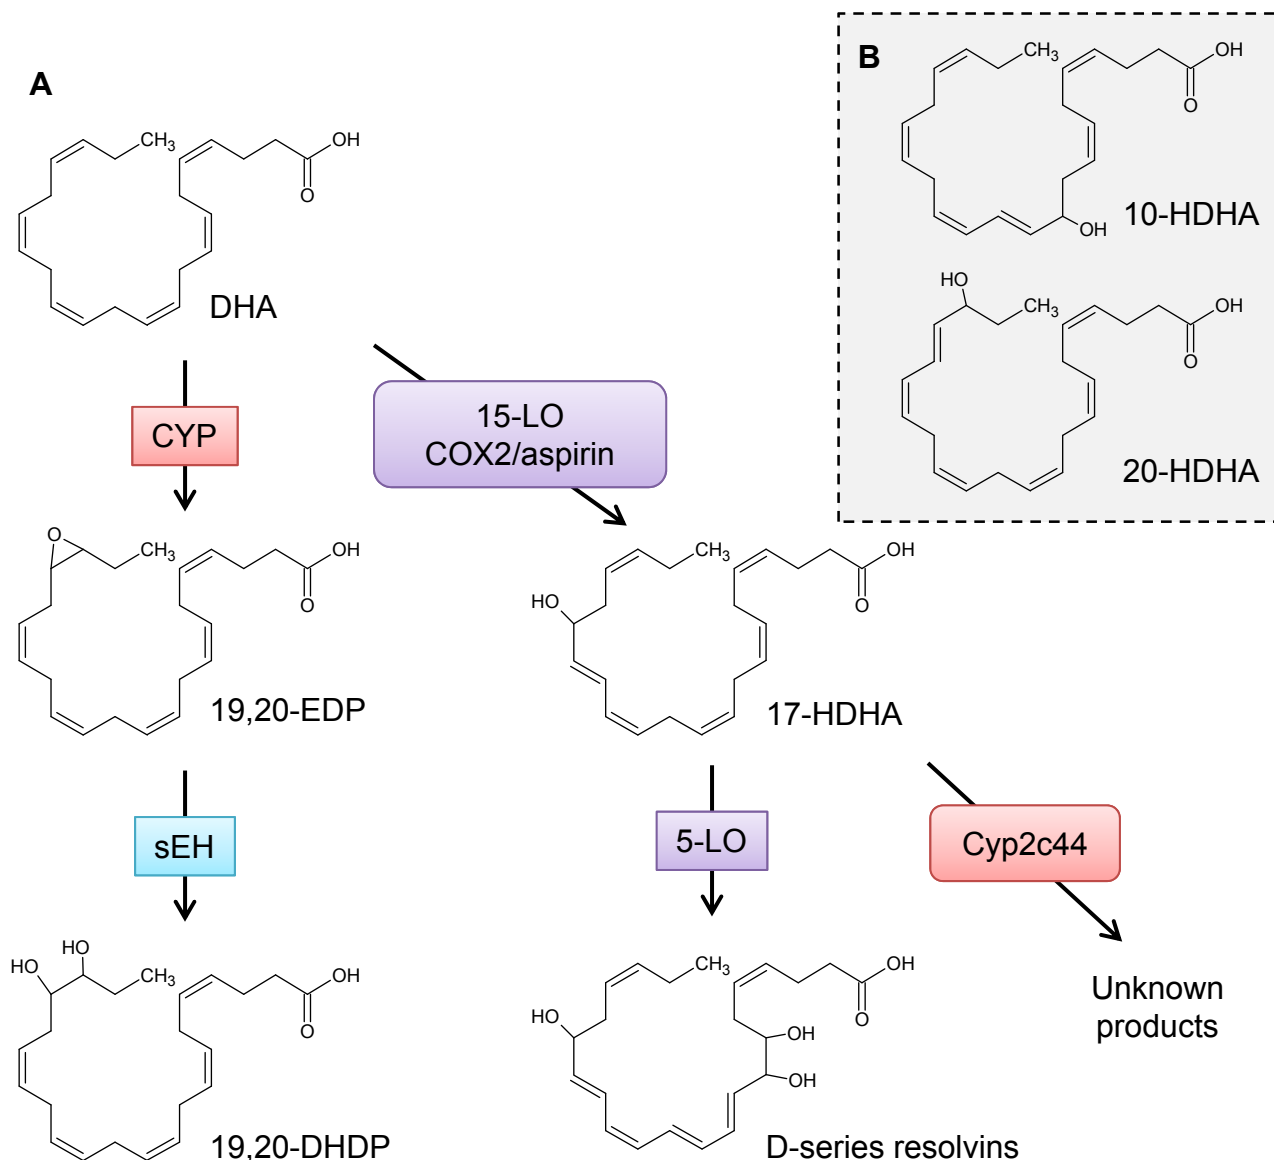

**Supplementary Figure 3. The biosynthesis and chemical structure of HDHAs.** (A) Docosahexaenoic acid (DHA) is converted by CYP epoxygenases (CYP) for example to the epoxide 19,20-epoxydocosapentaenoic acid (EDP), which is subsequently metabolised to 19,20-dihydroxydocosapentaenoic acid (DHDP) by the soluble epoxide hydrolase (sEH). DHA can also be transformed by 15-lipoxygenase (15-LO) or acetylated COX-2 to 17-hydroxydocosahexaenoic acid (17-HDHA). The further processing of 17-HDHA by 5-lipoxygenase (5-LO) leads to the D-series resolvins which differ in their stereochemistry at the 17 carbon position. In this manuscript, we proposed that the 17-HDHA is metabolised by Cyp2c44 and to as yet unidentified products. (B) The chemical structure of 10-HDHA and 20-HDHA.

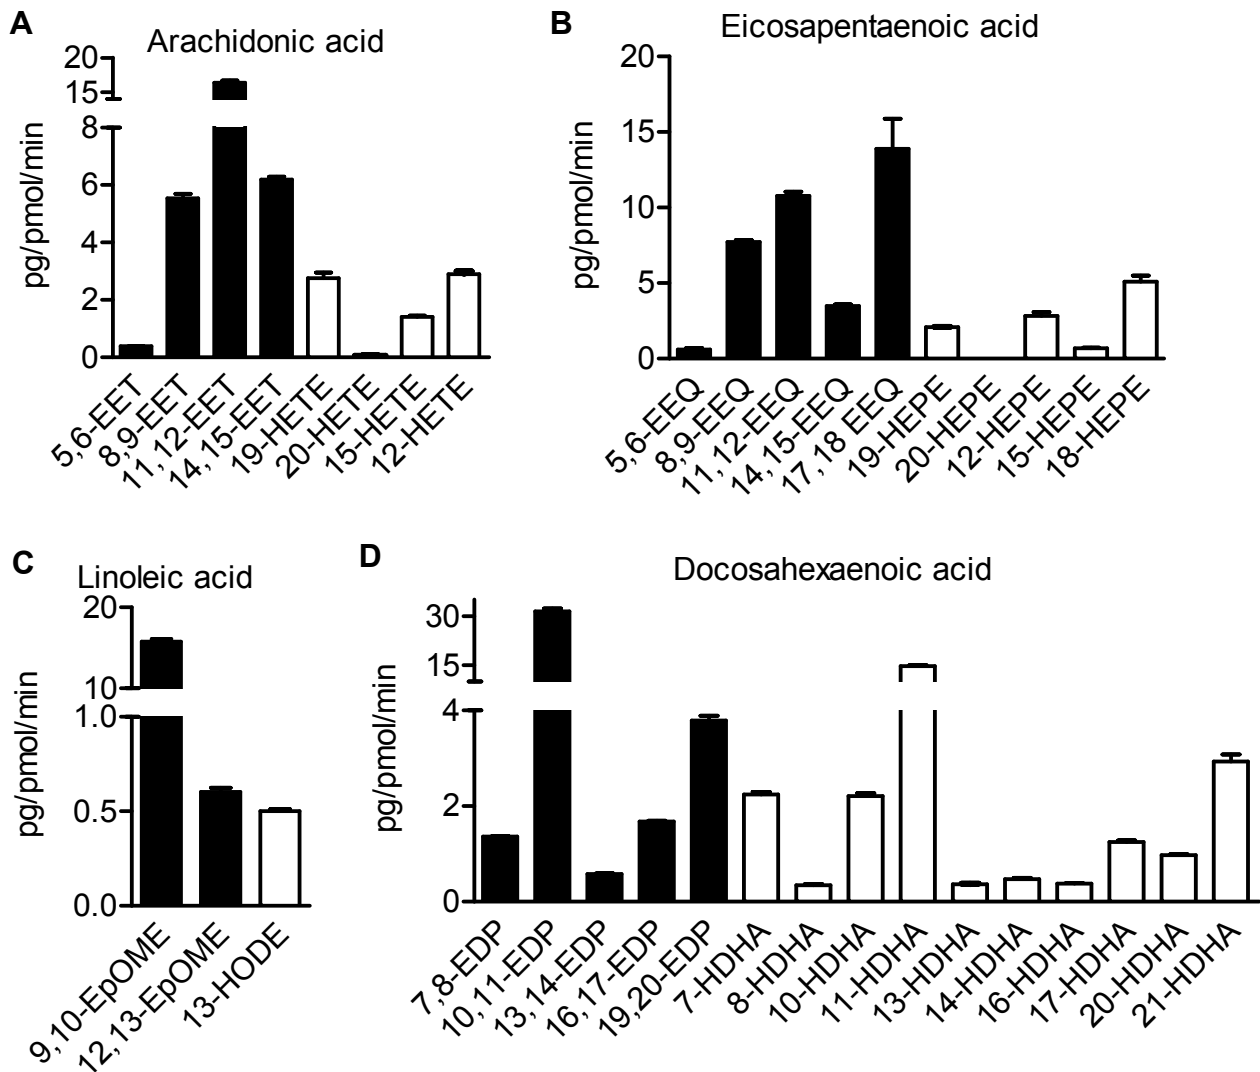

**Supplementary Figure 4. Products generated by Cyp2c44 *in vitro*.** Enzyme activity assays were performed with microsomes (50 pmol) isolated from SF9 cells overexpressing Cyp2c44 and human oxidoreductase and supplemented with (A) arachidonic acid, (B) eicosapentaenoic acid, (C) linoleic acid, and (D) docosahexaenoic acid (each 10  $\mu\text{mol/L}$ ). The CYP products were measured by LC-MS/MS; the black bars indicate epoxides, the white bars the hydroxylated products. The graphs summarize the data from 3 independent experiments.

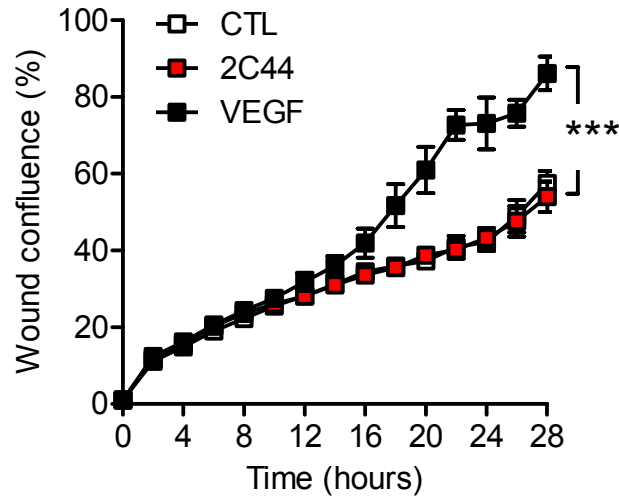

**Supplementary Figure 5. Consequence of Cyp2c44 overexpression on endothelial cell migration.** Human endothelial cells were transiently transfected with either a control plasmid or a Cyp2c44 overexpression plasmid. Endothelial cell migration was studied in a scratch wound assay and the time course of wound closure (%) assessed over 28 hours using an automated microscope system. The graph summarises data from 6 independent experiments, each using a different batch of endothelial cells; \*\*\* P<0.001.
